# Supplementary material for: Visible-light CO2 reduction over a ruthenium(ii)-complex/C3N4 hybrid photocatalyst: the promotional effect of silver species
Source: Royal Society of Chemistry journal article supplement (doi:10.1039/c8ta03245a), 2018-01-01
Supplement: c8ta03245a1.pdf [file c8ta03245a1.pdf]

*Electronic Supplementary Information*

# Visible-light CO<sub>2</sub> reduction over a ruthenium(II)-complex/C<sub>3</sub>N<sub>4</sub> hybrid photocatalyst: the promotional effect of silver species

*Kazuhiko Maeda,\*<sup>a</sup> Daehyeon An,<sup>a</sup> Chandana Sampath Kumara Ranasinghe,<sup>b</sup> Tomoki Uchiyama,<sup>c</sup>  
Ryo Kuriki,<sup>a,d</sup> Tomoki Kanazawa,<sup>a</sup> Daling Lu,<sup>e</sup> Shunsuke Nozawa,<sup>f</sup> Akira Yamakata,<sup>b</sup> Yoshiharu  
Uchimoto,<sup>c</sup> Osamu Ishitani<sup>a</sup>*

<sup>a</sup> Department of Chemistry, School of Science, Tokyo Institute of Technology, 2-12-1-NE-2  
Ookayama, Meguro-ku, Tokyo 152-8550, Japan.

<sup>b</sup> Graduate School of Engineering, Toyota Technological Institute, 2-12-1 Hisakata, Tempaku,  
Nagoya 468-8511, Japan.

<sup>c</sup> Graduate School of Human and Environmental Studies, Kyoto University, Nihonmatsu-cho,  
Yoshida, Sakyo-ku, Kyoto 606-8317, Japan.

<sup>d</sup> Japan Society for the Promotion of Science, Kojimachi Business Center Building, 5-3-1,  
Kojimachi, Chiyoda-ku, Tokyo 102-0083, Japan.

<sup>e</sup> Suzukakedai Materials Analysis Division, Technical Department, Tokyo Institute of Technology  
4259 Nagatsuta-cho, Midori-ku, Yokohama 226-8503, Japan.

<sup>f</sup> I Institute of Materials Structure Science, High Energy Accelerator Research Organization, 1-1  
Oho, Tsukuba, Ibaraki 305-0801, Japan.

\*To whom corresponding author should be addressed.

TEL: +81-3-5734-2239, FAX: +81-3-5734-2284

Email: maedak@chem.titech.ac.jp

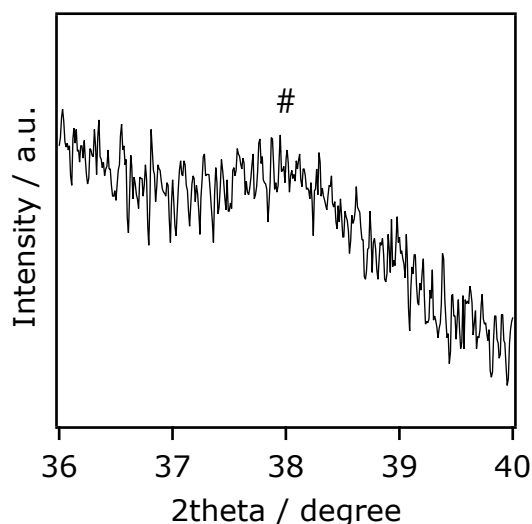

**Fig. S1.** An enlarged view of the XRD pattern of 2.0 wt% Ag-modified NS-C<sub>3</sub>N<sub>4</sub> treated at 623 K with H<sub>2</sub>. The # mark is assigned to (111) diffraction peak of Ag<sup>0</sup>.

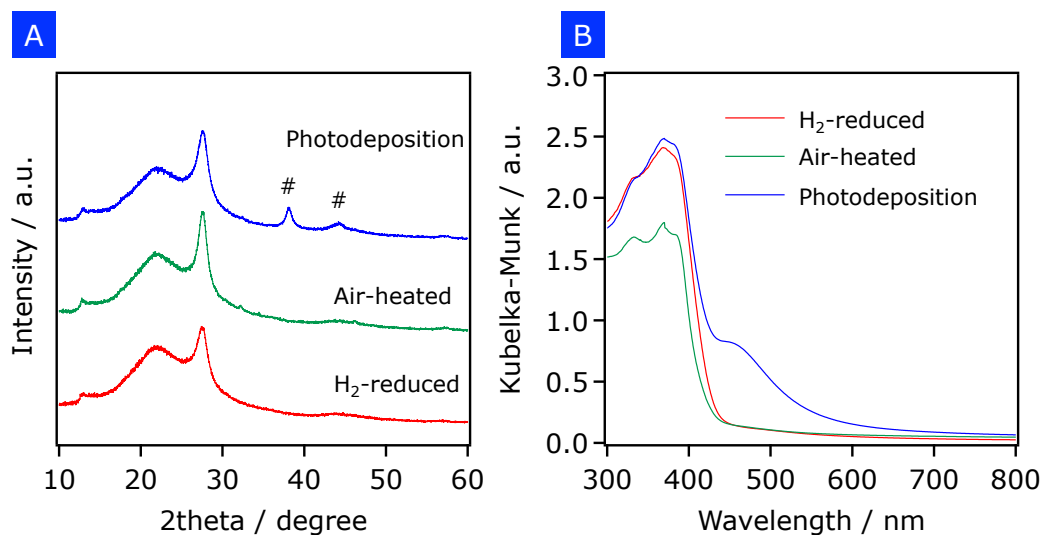

**Fig. S2.** (A) XRD patterns and (B) diffuse reflectance spectra of 2.0 wt% Ag-modified NS-C<sub>3</sub>N<sub>4</sub> prepared at different conditions. The # mark in the panel (A) is assigned to (111) diffraction peak of Ag<sup>0</sup>. A broad peak at around 22 degree in XRD patterns originated from a glass folder for the measurement.
